# Supplementary material for: Synthesis and applications of fluorous phosphines
Source: Royal Society of Chemistry journal article supplement (doi:10.1039/c6qo00115g), 2016-01-01
Supplement: c6qo00115g1.pdf [file c6qo00115g1.pdf]

## Synthesis and Applications of Fluorous Phosphines

Chung-kay Edwin Law<sup>a</sup> and István T. Horváth<sup>a\*</sup>

<sup>a</sup>Department of Biology and Chemistry,  
City University of Hong Kong,  
83 Tat Chee Avenue,  
Kowloon Tong, Hong Kong  
Email: istvan.t.horvath@cityu.edu.hk.

Dedicated to Prof. Barry Trost on the occasion of his 75th birthday.

|    | Formula                                           | M. W. | F (wt%) | P <sup>a</sup> | P <sub>M</sub> <sup>f</sup> | m. p. (°C) | b. p. (°C)       | cone angle (°) | <sup>31</sup> P NMR | Ref. |
|----|---------------------------------------------------|-------|---------|----------------|-----------------------------|------------|------------------|----------------|---------------------|------|
| 1a | C <sub>18</sub> H <sub>12</sub> F <sub>27</sub> P | 772   | 66.5    | N/A            | N/A                         | N/A        | N/A              | N/A            | N/A                 | 10a  |
| 1b | C <sub>24</sub> H <sub>12</sub> F <sub>39</sub> P | 1072  | 69.1    | 82.3           | N/A                         | N/A        | 150 <sup>w</sup> | 103.2          | -25.5               | 12a  |
| 1c | C <sub>30</sub> H <sub>12</sub> F <sub>51</sub> P | 1372  | 70.6    | >332           | N/A                         | 47.5       | 175 <sup>x</sup> | 104.1          | -25.4               | 13   |
| 1d | C <sub>36</sub> H <sub>12</sub> F <sub>63</sub> P | 1672  | 71.6    | >332           | N/A                         | 100.8      | N/A              | N/A            | -25.5               | 13   |
| 2a | C <sub>21</sub> H <sub>18</sub> F <sub>27</sub> P | 814   | 63      | N/A            | N/A                         | N/A        | N/A              | N/A            | -34.5               | 22   |
| 2b | C <sub>26</sub> H <sub>18</sub> F <sub>39</sub> P | 1102  | 67.2    | N/A            | 713 <sup>s</sup>            | N/A        | N/A              | N/A            | -34.6               | 22   |
| 2c | C <sub>33</sub> H <sub>18</sub> F <sub>51</sub> P | 1414  | 68.5    | 82.3           | 832 <sup>s</sup>            | 67.1       | N/A              | N/A            | -34.8               | 22   |
| 2d | C <sub>39</sub> H <sub>18</sub> F <sub>63</sub> P | 1714  | 69.8    | N/A            | N/A                         | N/A        | N/A              | N/A            | N/A                 | 13   |
| 3  | C <sub>36</sub> H <sub>24</sub> F <sub>51</sub> P | 1456  | 66.6    | 89.9           | N/A                         | 40.2       | N/A              | N/A            | -32.8               | 22   |
| 4  | C <sub>39</sub> H <sub>30</sub> F <sub>51</sub> P | 1498  | 64.7    | 89.9           | N/A                         | N/A        | N/A              | N/A            | N/A                 | 16   |
| 5  | C <sub>25</sub> H <sub>18</sub> F <sub>35</sub> P | 1014  | 65.6    | N/A            | N/A                         | N/A        | N/A              | N/A            | -33.5               | 15   |
| 6  | C <sub>29</sub> H <sub>14</sub> F <sub>47</sub> P | 1286  | 69.4    | N/A            | N/A                         | N/A        | N/A              | N/A            | -27.8               | 15   |
| 7  | C <sub>31</sub> H <sub>14</sub> F <sub>51</sub> P | 1386  | 69.9    | N/A            | N/A                         | 59.5-60    | N/A              | N/A            | -28.2               | 16   |
| 8  | C <sub>32</sub> H <sub>16</sub> F <sub>51</sub> P | 1400  | 69.2    | N/A            | N/A                         | 68.5-69    | N/A              | N/A            | -31.3               | 16   |

|     | Formula                                                        | M. W. | F (wt%) | P <sup>a</sup> | P <sub>M</sub> <sup>f</sup> | m. p. (°C) | b. p. (°C)           | cone angle (°) | <sup>31</sup> P NMR | Ref. |
|-----|----------------------------------------------------------------|-------|---------|----------------|-----------------------------|------------|----------------------|----------------|---------------------|------|
| 9   | C <sub>35</sub> H <sub>22</sub> F <sub>51</sub> P              | 1442  | 67.2    | N/A            | N/A                         | N/A        | N/A                  | N/A            | -34.7               | 16   |
| 10  | C <sub>35</sub> H <sub>22</sub> F <sub>51</sub> P              | 1442  | 67.2    | N/A            | N/A                         | 49-49.5    | N/A                  | N/A            | -33.6               | 16   |
| 11  | C <sub>32</sub> H <sub>20</sub> F <sub>47</sub> P              | 1328  | 67.2    | N/A            | N/A                         | N/A        | N/A                  | N/A            | -34                 | 22   |
| 12  | C <sub>30</sub> H <sub>12</sub> F <sub>51</sub> P              | 1372  | 70.6    | >332           | N/A                         | 43.4-50    | 215 <sup>y</sup>     | N/A            | -25.3               | 14a  |
| 13a | C <sub>12</sub> H <sub>14</sub> F <sub>13</sub> P              | 436   | 56.7    | N/A            | N/A                         | N/A        | N/A                  | N/A            | N/A                 | 18   |
| 13b | C <sub>14</sub> H <sub>18</sub> F <sub>13</sub> P              | 464   | 53.2    | N/A            | N/A                         | N/A        | N/A                  | N/A            | 5.16                | 17   |
| 13c | C <sub>20</sub> H <sub>26</sub> F <sub>13</sub> P              | 544   | 45.4    | N/A            | N/A                         | N/A        | N/A                  | N/A            | -0.71               | 17   |
| 14  | C <sub>34</sub> H <sub>20</sub> F <sub>52</sub> P <sub>2</sub> | 1478  | 66.8    | N/A            | N/A                         | N/A        | N/A                  | N/A            | -24.1               | 18   |
| 15a | C <sub>37</sub> H <sub>26</sub> F <sub>52</sub> P <sub>2</sub> | 1520  | 65      | 20.3           | 37.5 <sup>t</sup>           | N/A        | N/A                  | N/A            | -26.8               | 19   |
| 15b | C <sub>45</sub> H <sub>26</sub> F <sub>68</sub> P <sub>2</sub> | 1920  | 67.3    | 82.3           | 141.9 <sup>t</sup>          | 42         | N/A                  | 108.1          | -26.7               | 19   |
| 15c | C <sub>56</sub> H <sub>26</sub> F <sub>84</sub> P <sub>2</sub> | 2356  | 67.7    | 142            | 332.3 <sup>t</sup>          | 73         | N/A                  | N/A            | -26.6               | 19   |
| 16a | C <sub>40</sub> H <sub>24</sub> F <sub>42</sub> P <sub>2</sub> | 1555  | 63.5    | N/A            | N/A                         | N/A        | N/A                  | 105.5          | -21.5               | 20   |
| 16b | C <sub>48</sub> H <sub>24</sub> F <sub>68</sub> P <sub>2</sub> | 1954  | 66.1    | N/A            | N/A                         | 63         | N/A                  | 105.7          | -19.4               | 20   |
| 17a | C <sub>26</sub> H <sub>26</sub> F <sub>26</sub> P              | 864   | 57.2    | 3.63           | N/A                         | N/A        | N/A                  | N/A            | -24.1               | 21   |
| 17b | C <sub>30</sub> H <sub>26</sub> F <sub>34</sub> P              | 1064  | 60.7    | 14.9           | N/A                         | N/A        | 157-160 <sup>z</sup> | N/A            | -24                 | 21   |
| 18  | C <sub>30</sub> H <sub>48</sub> F <sub>16</sub> P <sub>2</sub> | 774   | 39.3    | N/A            | N/A                         | 52-54      | N/A                  | N/A            | -25.5               | 23   |
| 19a | C <sub>6</sub> F <sub>15</sub> P                               | 388   | 73.5    | N/A            | N/A                         | N/A        | N/A                  | N/A            | 13.7                | 24   |
| 19b | C <sub>9</sub> F <sub>21</sub> P                               | 538   | 74.2    | N/A            | N/A                         | N/A        | N/A                  | N/A            | 23.3                | 24   |
| 19c | C <sub>12</sub> F <sub>27</sub> P                              | 688   | 74.6    | N/A            | N/A                         | N/A        | N/A                  | N/A            | 23.7                | 24   |
| 19d | C <sub>15</sub> F <sub>33</sub> P                              | 838   | 74.8    | N/A            | N/A                         | N/A        | N/A                  | N/A            | 26.8                | 24   |
| 19e | C <sub>18</sub> F <sub>39</sub> P                              | 988   | 75      | N/A            | N/A                         | N/A        | N/A                  | N/A            | 25                  | 24   |
| 19f | C <sub>8</sub> F <sub>19</sub> P                               | 488   | 74      | N/A            | N/A                         | N/A        | N/A                  | N/A            | 7.6                 | 24   |
| 20a | C <sub>18</sub> H <sub>18</sub> F <sub>21</sub> P              | 664   | 60.1    | N/A            | N/A                         | N/A        | N/A                  | N/A            | N/A                 | 26   |
| 20b | C <sub>14</sub> H <sub>10</sub> F <sub>21</sub> P              | 608   | 65.6    | N/A            | N/A                         | N/A        | N/A                  | N/A            | N/A                 | 27   |

|     | Formula                                                                          | M. W. | F (wt%) | P <sup>a</sup>                                                                                    | P <sub>M</sub> <sup>f</sup> | m. p. (°C) | b. p. (°C) | cone angle (°) | <sup>31</sup> P NMR | Ref.   |
|-----|----------------------------------------------------------------------------------|-------|---------|---------------------------------------------------------------------------------------------------|-----------------------------|------------|------------|----------------|---------------------|--------|
| 20c | C <sub>22</sub> H <sub>22</sub> F <sub>21</sub> P                                | 716   | 55.7    | N/A                                                                                               | N/A                         | N/A        | N/A        | N/A            | N/A                 | 27     |
| 21  | C <sub>10</sub> F <sub>24</sub> P <sub>2</sub>                                   | 638   | 71.5    | N/A                                                                                               | N/A                         | N/A        | N/A        | N/A            | 4.7                 | 24     |
| 22  | C <sub>20</sub> H <sub>14</sub> F <sub>13</sub> P                                | 532   | 46.4    | N/A                                                                                               | N/A                         | 42-44      | N/A        | N/A            | N/A                 | 12a    |
| 23  | C <sub>22</sub> H <sub>13</sub> F <sub>26</sub> P                                | 802   | 61.6    | N/A                                                                                               | N/A                         | 35-37      | N/A        | N/A            | N/A                 | 12a    |
| 24a | C <sub>15</sub> H <sub>10</sub> F <sub>7</sub> P                                 | 354   | 37.6    | N/A                                                                                               | N/A                         | N/A        | N/A        | N/A            | N/A                 | 26     |
| 24b | C <sub>16</sub> H <sub>10</sub> F <sub>9</sub> P                                 | 404   | 42.3    | N/A                                                                                               | N/A                         | N/A        | N/A        | N/A            | N/A                 | 26     |
| 24c | C <sub>18</sub> H <sub>11</sub> F <sub>12</sub> P                                | 486   | 46.9    | N/A                                                                                               | N/A                         | N/A        | N/A        | N/A            | N/A                 | 10a    |
| 24d | C <sub>18</sub> H <sub>10</sub> F <sub>13</sub> P                                | 504   | 49      | N/A                                                                                               | N/A                         | N/A        | N/A        | N/A            | 1.07-2.25           | 25, 26 |
| 24e | C <sub>18</sub> H <sub>10</sub> F <sub>11</sub> P                                | 466   | 44.8    | N/A                                                                                               | N/A                         | N/A        | N/A        | N/A            | N/A                 | 26     |
| 24f | C <sub>20</sub> H <sub>10</sub> F <sub>17</sub> P                                | 604   | 53.5    | N/A                                                                                               | N/A                         | N/A        | N/A        | N/A            | 1.29-2.39           | 26     |
| 24g | C <sub>22</sub> H <sub>11</sub> F <sub>21</sub> P                                | 705   | 56.6    | 1.17 <sup>b</sup> , 0.28 <sup>c</sup><br>0.16 <sup>d</sup> , 0.27 <sup>e</sup> , 0.4 <sup>f</sup> | N/A                         | 52-52.9    | N/A        | N/A            | 1.15-2.41           | 26     |
| 24h | C <sub>24</sub> H <sub>11</sub> F <sub>25</sub> P                                | 805   | 59      | N/A                                                                                               | N/A                         | 80.2-81.8  | N/A        | N/A            | 1.45-2.55           | 26     |
| 25a | C <sub>30</sub> H <sub>26</sub> F <sub>21</sub> P                                | 817   | 48.8    | N/A                                                                                               | N/A                         | 76-77      | N/A        | N/A            | -0.8                | 27     |
| 25b | C <sub>24</sub> H <sub>14</sub> F <sub>21</sub> O <sub>2</sub> P                 | 764   | 52.2    | N/A                                                                                               | N/A                         | 176-177    | N/A        | N/A            | -0.91               | 27     |
| 25c | C <sub>24</sub> H <sub>14</sub> F <sub>21</sub> O <sub>2</sub> P                 | 764   | 52.2    | N/A                                                                                               | N/A                         | N/A        | N/A        | N/A            | 3.65                | 27     |
| 25d | C <sub>22</sub> H <sub>8</sub> F <sub>23</sub> P                                 | 740   | 59.1    | N/A                                                                                               | N/A                         | 63-64      | N/A        | N/A            | -0.38               | 27     |
| 26  | C <sub>50</sub> H <sub>20</sub> F <sub>52</sub> P <sub>2</sub>                   | 1703  | 58      | N/A                                                                                               | N/A                         | 88-90      | N/A        | N/A            | N/A                 | 12a    |
| 27  | C <sub>64</sub> H <sub>40</sub> F <sub>52</sub> P <sub>2</sub>                   | 1834  | 53.9    | N/A                                                                                               | N/A                         | 80-82      | N/A        | N/A            | -11.5               | 45     |
| 28a | C <sub>66</sub> H <sub>60</sub> F <sub>52</sub> Si <sub>4</sub> P <sub>2</sub>   | 2014  | 49.1    | 0.4 <sup>g</sup>                                                                                  | 1.6 <sup>u</sup>            | N/A        | N/A        | N/A            | -11.3               | 46a    |
| 28b | C <sub>74</sub> H <sub>60</sub> F <sub>68</sub> Si <sub>4</sub> P <sub>2</sub>   | 1938  | 66.7    | N/A                                                                                               | 3.7 <sup>u</sup>            | N/A        | N/A        | N/A            | -11.3               | 46a    |
| 29  | C <sub>94</sub> H <sub>64</sub> F <sub>104</sub> Si <sub>4</sub> P <sub>2</sub>  | 3342  | 59.1    | 12 <sup>g</sup>                                                                                   | 8 <sup>u</sup>              | N/A        | N/A        | N/A            | -11.4               | 46a    |
| 30  | C <sub>122</sub> H <sub>68</sub> F <sub>156</sub> Si <sub>4</sub> P <sub>2</sub> | 4670  | 63.5    | >50 <sup>g</sup>                                                                                  | 23 <sup>u</sup>             | N/A        | N/A        | N/A            | -11.4               | 46a    |
| 31a | C <sub>42</sub> H <sub>40</sub> F <sub>16</sub> P <sub>2</sub>                   | 910   | 33.4    | N/A                                                                                               | N/A                         | 60-63      | N/A        | N/A            | -18.9               | 23     |

|     | Formula                                                        | M. W. | F (wt%) | P <sup>a</sup>                                             | P <sub>M</sub> <sup>r</sup> | m. p. (°C)  | b. p. (°C) | cone angle (°) | <sup>31</sup> P NMR | Ref.   |
|-----|----------------------------------------------------------------|-------|---------|------------------------------------------------------------|-----------------------------|-------------|------------|----------------|---------------------|--------|
| 31b | C <sub>42</sub> H <sub>40</sub> F <sub>16</sub> P <sub>2</sub> | 910   | 33.4    | N/A                                                        | N/A                         | 94-96       | N/A        | N/A            | -39.3               | 23     |
| 32  | C <sub>28</sub> H <sub>20</sub> F <sub>8</sub> P <sub>2</sub>  | 570   | 26.7    | N/A                                                        | N/A                         | N/A         | N/A        | N/A            | N/A                 | 26, 27 |
| 33  | C <sub>30</sub> H <sub>20</sub> F <sub>12</sub> P <sub>2</sub> | 670   | 34      | N/A                                                        | N/A                         | N/A         | N/A        | N/A            | N/A                 | 26, 27 |
| 34  | C <sub>42</sub> F <sub>63</sub> P                              | 1732  | 69.1    | N/A                                                        | N/A                         | 117         | N/A        | N/A            | N/A                 | 47     |
| 35a | C <sub>24</sub> H <sub>14</sub> F <sub>13</sub> P              | 580   | 42.6    | N/A                                                        | N/A                         | N/A         | 120-124*   | 103.4          | -6.7                | 12a    |
| 35b | C <sub>24</sub> H <sub>14</sub> F <sub>13</sub> P              | 580   | 42.6    | N/A                                                        | N/A                         | 76-78       | N/A        | N/A            | N/A                 | 12a    |
| 36a | C <sub>30</sub> H <sub>13</sub> F <sub>26</sub> P              | 898   | 55      | 1.56 <sup>h</sup>                                          | N/A                         | 54-56       | N/A        | N/A            | -4                  | 48a    |
| 36b | C <sub>34</sub> H <sub>13</sub> F <sub>34</sub> P              | 1098  | 58.8    | 3.17 <sup>h</sup>                                          | N/A                         | 53-55       | N/A        | N/A            | -4.4                | 48a    |
| 37  | C <sub>26</sub> H <sub>18</sub> F <sub>13</sub> P              | 608   | 40.6    | 0.12 <sup>b</sup> , 0.02 <sup>i</sup> , 0.05 <sup>j</sup>  | N/A                         | N/A         | N/A        | N/A            | -5.11               | 49     |
| 38  | C <sub>25</sub> H <sub>16</sub> F <sub>13</sub> P              | 594   | 41.6    | 0.09 <sup>b</sup> , 0.01 <sup>i</sup> , 0.12 <sup>j</sup>  | N/A                         | N/A         | N/A        | N/A            | -5.39               | 49     |
| 39  | C <sub>30</sub> H <sub>13</sub> F <sub>26</sub> P              | 898   | 55      | N/A                                                        | N/A                         | N/A         | N/A        | N/A            | N/A                 | 12a    |
| 40a | C <sub>41</sub> H <sub>11</sub> F <sub>52</sub> P              | 1534  | 64.4    | 9 <sup>h</sup>                                             | N/A                         | 56-58       | N/A        | N/A            | -5.3                | 48a    |
| 40b | C <sub>50</sub> H <sub>11</sub> F <sub>68</sub> P              | 1934  | 66.8    | N/A                                                        | N/A                         | N/A         | N/A        | N/A            | N/A                 | 48a    |
| 41  | C <sub>34</sub> H <sub>21</sub> F <sub>26</sub> P              | 954   | 51.8    | 1.86 <sup>b</sup> , 0.05 <sup>i</sup> , 0.05 <sup>j</sup>  | N/A                         | N/A         | N/A        | N/A            | -5.91               | 49     |
| 42  | C <sub>32</sub> H <sub>17</sub> F <sub>26</sub> P              | 926   | 53.3    | 3.34 <sup>b</sup> , 1.05 <sup>i</sup> , 0.18 <sup>j</sup>  | N/A                         | N/A         | N/A        | N/A            | -6.29               | 49     |
| 43  | C <sub>36</sub> H <sub>12</sub> F <sub>39</sub> P              | 1216  | 60.9    | 2.2 <sup>i</sup> , 4.4 <sup>j</sup>                        | N/A                         | 65-67       | N/A        | 105.8          | N/A                 | 12a    |
| 44a | C <sub>41</sub> H <sub>11</sub> F <sub>52</sub> P              | 1534  | 64.4    | 99 <sup>h</sup>                                            | N/A                         | N/A         | N/A        | N/A            | -6.3                | 48a    |
| 44b | C <sub>56</sub> H <sub>10</sub> F <sub>81</sub> P              | 2252  | 68.3    | N/A                                                        | N/A                         | N/A         | N/A        | N/A            | N/A                 | 48a    |
| 45a | C <sub>42</sub> H <sub>24</sub> F <sub>39</sub> P              | 1300  | 57      | 30.03 <sup>b</sup> , 0.08 <sup>i</sup> , 0.75 <sup>j</sup> | N/A                         | N/A         | N/A        | N/A            | -6.65               | 49     |
| 45b | C <sub>48</sub> H <sub>24</sub> F <sub>51</sub> P              | 1600  | 60.6    | N/A                                                        | >999 <sup>v</sup>           | N/A         | N/A        | N/A            | N/A                 | 49, 63 |
| 46  | C <sub>39</sub> H <sub>18</sub> F <sub>39</sub> P              | 1258  | 58.9    | 18.48 <sup>b</sup> , 0.51 <sup>i</sup> , 6.84 <sup>j</sup> | N/A                         | N/A         | N/A        | N/A            | -7.12               | 49     |
| 47a | C <sub>45</sub> H <sub>30</sub> F <sub>39</sub> P              | 1342  | 55.2    | 0.242                                                      | N/A                         | 91.5-92.7   | N/A        | N/A            | -7.3                | 50     |
| 47b | C <sub>51</sub> H <sub>30</sub> F <sub>51</sub> P              | 1642  | 59      | 1.99                                                       | >999 <sup>v</sup>           | 120-121     | N/A        | N/A            | -7.4                | 50, 63 |
| 47c | C <sub>57</sub> H <sub>30</sub> F <sub>63</sub> P              | 1882  | 63.6    | N/A                                                        | N/A                         | 139.7-140.5 | N/A        | N/A            | -7.1                | 50     |

|     | Formula                                                                        | M. W. | F (wt%) | P <sup>a</sup>                                          | P <sub>M</sub> <sup>r</sup>          | m. p. (°C) | b. p. (°C) | cone angle (°) | <sup>31</sup> P NMR | Ref. |
|-----|--------------------------------------------------------------------------------|-------|---------|---------------------------------------------------------|--------------------------------------|------------|------------|----------------|---------------------|------|
| 48  | C <sub>84</sub> H <sub>45</sub> F <sub>102</sub> P                             | 3022  | 64.1    | N/A                                                     | N/A                                  | N/A        | N/A        | N/A            | N/A                 | 51   |
| 49a | C <sub>48</sub> H <sub>42</sub> F <sub>39</sub> Si <sub>3</sub> P              | 1474  | 50.3    | 0.26 <sup>a</sup> , 1.1 <sup>k</sup> , 1.5 <sup>l</sup> | 293 <sup>g,s</sup> , 76 <sup>s</sup> | 89         | N/A        | N/A            | -4.66               | 52a  |
| 49b | C <sub>54</sub> H <sub>42</sub> F <sub>51</sub> Si <sub>3</sub> P              | 1774  | 54.6    | 2.2 <sup>a</sup> , 4.6 <sup>k</sup> , 2.2 <sup>l</sup>  | 887 <sup>g,s</sup>                   | 101        | N/A        | N/A            | -4.67               | 52a  |
| 50a | C <sub>69</sub> H <sub>45</sub> F <sub>78</sub> Si <sub>3</sub> P              | 2470  | 60      | 7.8 <sup>a</sup> , 17 <sup>k</sup> , 5.7 <sup>l</sup>   | N/A                                  | 67         | N/A        | N/A            | -4.62               | 52a  |
| 50b | C <sub>81</sub> H <sub>45</sub> F <sub>102</sub> Si <sub>3</sub> P             | 3070  | 63.1    | 7.8 <sup>a</sup> , 28 <sup>k</sup> , 9.2 <sup>l</sup>   | N/A                                  | 72         | N/A        | N/A            | -4.7                | 52a  |
| 51a | C <sub>90</sub> H <sub>48</sub> F <sub>117</sub> Si <sub>3</sub> P             | 3466  | 64.1    | 4.3 <sup>a</sup> , 9.4 <sup>k</sup> , 15 <sup>l</sup>   | N/A                                  | 50-55      | N/A        | N/A            | -4.49               | 52a  |
| 51b | C <sub>108</sub> H <sub>48</sub> F <sub>153</sub> Si <sub>3</sub> P            | 4894  | 59.4    | 2.1 <sup>a</sup> , 12 <sup>k</sup> , 20 <sup>l</sup>    | N/A                                  | 124        | N/A        | N/A            | -4.49               | 52a  |
| 52a | C <sub>76</sub> H <sub>28</sub> F <sub>68</sub> P <sub>2</sub>                 | 2294  | 56.3    | N/A                                                     | N/A                                  | N/A        | N/A        | N/A            | -15.4               | 54a  |
| 52b | C <sub>92</sub> H <sub>26</sub> F <sub>102</sub> P <sub>2</sub>                | 3130  | 61.9    | N/A                                                     | N/A                                  | N/A        | N/A        | N/A            | -15.85              | 54a  |
| 52c | C <sub>60</sub> H <sub>30</sub> F <sub>34</sub> P <sub>2</sub>                 | 1459  | 44.3    | N/A                                                     | N/A                                  | N/A        | N/A        | N/A            | -14.2               | 54a  |
| 52d | C <sub>56</sub> H <sub>30</sub> F <sub>26</sub> P <sub>2</sub>                 | 1259  | 39.2    | N/A                                                     | N/A                                  | N/A        | N/A        | N/A            | -13.5               | 54c  |
| 52e | C <sub>60</sub> H <sub>38</sub> F <sub>26</sub> P <sub>2</sub>                 | 1315  | 37.6    | N/A                                                     | N/A                                  | N/A        | N/A        | N/A            | -15.4               | 54c  |
| 53  | C <sub>76</sub> H <sub>36</sub> F <sub>60</sub> O <sub>4</sub> P <sub>2</sub>  | 2215  | 51.5    | N/A                                                     | N/A                                  | 49-50      | N/A        | N/A            | -17.3               | 56c  |
| 54  | C <sub>92</sub> H <sub>54</sub> F <sub>78</sub> Si <sub>2</sub> P <sub>2</sub> | 2759  | 53.7    | 3.8 <sup>m</sup> , 49 <sup>n</sup> , 49 <sup>o</sup>    | N/A                                  | N/A        | N/A        | N/A            | -14.1               | 55   |
| 55  | C <sub>56</sub> H <sub>26</sub> F <sub>45</sub> O <sub>3</sub> P               | 1633  | 52.4    | N/A                                                     | N/A                                  | 49         | N/A        | N/A            | -15.5               | 56a  |
| 56  | C <sub>56</sub> H <sub>22</sub> F <sub>49</sub> OP                             | 1672  | 55.7    | N/A                                                     | N/A                                  | 39-41      | N/A        | N/A            | -11.2               | 56d  |
| 57  | C <sub>81</sub> H <sub>47</sub> F <sub>78</sub> OSi <sub>2</sub> P             | 2605  | 56.9    | N/A                                                     | N/A                                  | N/A        | N/A        | N/A            | -12.2               | 56d  |
| 58  | C <sub>42</sub> H <sub>18</sub> F <sub>45</sub> O <sub>3</sub> P               | 1457  | 58.7    | 24.6 <sup>p</sup> , 10.4 <sup>q</sup>                   | N/A                                  | N/A        | N/A        | N/A            | -9.5                | 58c  |

**Footnotes:**

- Partition Coefficient in Perfluoro(methyl)cyclohexane (PFMCH)/Toluene bi-phase at ambient condition, unless stated otherwise.
- FC-72/MeOH.
- FC-72/Acetone

- d. FC-72/EtOAc
- e. FC-72/CHCl<sub>3</sub>
- f. FC-72/Benzene
- g. Measured at 0°C.
- h. 1,3-dimethylperfluorocyclohexane/Toluene.
- i. FC-72/THF
- j. FC-72/Toluene
- k. PFMCH/Octane
- l. PFMCH/Pentane
- m. C<sub>6</sub>F<sub>14</sub>/Benzene
- n. C<sub>6</sub>F<sub>14</sub>/MeCN
- o. C<sub>6</sub>F<sub>14</sub>/DMF
- p. Galden D-100/Methanol
- q. Galden D-100/Toluene
- r. Partition Coefficient of the metal complex at ambient temperature (PFMCH: Toluene).
- s. Measured as the RhP<sub>3</sub>Cl complex.
- t. Measured as the (P<sup>^</sup>P)PdO<sub>2</sub>CCF<sub>3</sub> complex.
- u. Measured as the (P<sup>^</sup>P)NiCl<sub>2</sub> complex.
- v. Measured as the nickel salicylaldiminato phosphine complex.
- w. 0.05 mmHg
- x. 5 x 10<sup>-5</sup> mmHg
- y. 0.009 Torr
- z. 0.02 mmHg
- \* 0.04 mmHg

**The reference numbers listed here are the same as in the main text of the paper:**

- 10a D. Y. Mikhaylov, T. V. Gryaznova, Y. B. Dudkina, F. M. Polyancev, S. K. Latypov, O. G. Sinyashin and Y. Budnikova, *J. Fluorine Chem.*, 2013, **153**, 178.
- 12a P. Battacharyya, D. Gudmunsen, E. G. Hope, R. D. W. Kemmitt, D. R. Paige and A. M. Stuart, *J. Chem. Soc., Perkin Trans.*, 1997, **1**, 3609.
- 13 L. J. Alvey, D. Rutherford, J. J. Juliette, and J. A. Gladysz, *J. Org. Chem.*, 1998, **63**, 6302.
- 14a C. Emnet, R. Tuba and J. A. Gladysz, *Adv. Synth. Catal.*, 2005, **347**, 1819.
- 15 G. Vlád, F. U. Richter and I. T. Horváth, *Tet. Lett.*, 2005, **46**, 8605.
- 16 L. J. Alvey, R. Meier, T. Soós, P. Bernatis and J. A. Gladysz, *Eur. J. Inorg. Chem.*, 2000, 1975.
- 17 D. C. Smith, Jr., E. D. Stevens and S. P. Nolan, *Inorg. Chem.*, 1999, **38**, 5277.
- 18 M. F. Sellin, I. Bach, J. M. Webster, F. Montilla, V. Rosa, T. Avilés, M. Poliakoff and D. J. Cole-Hamilton, *J. Chem. Soc., Dalton Trans.*, 2002, 4569.
- 19 C. S. Consorti, F. Hampel and J.A. Gladysz, *Inorg. Chim. Acta*, 2006, **359**, 4874.

- 20 R. Tuba, V. Tesevic, L. V. Dinh, F. Hampel and J. A. Gladysz, *Dalton Trans.*, 2005, 2275.
- 21 A. Klose and J. A. Gladysz, *Tetrahedron: Asymmetry*, 1999, **10**, 2665.
- 22 G. Vlád, F. U. Richter and I. T. Horváth, *Org. Lett.*, 2004, **6**, 4559.
- 23 L. de Quadras, J. Stahl, F. Zhuravlev and J. A. Gladysz, *J. Organometallic Chem.*, 2007, **692**, 1859.
- 24 J. J. Kampa, J. W. Nail and R. J. Lagow, *Angew. Chem. Int. Ed.*, 1995, **34**, 1241.
- 26 S. Kawaguchi, Y. Minamida, T. Ohe, A. Nomoto, M. Sonoda and A. Ogawa, *Angew. Chem. Int. Ed.*, 2013, **52**, 1748.
- 27 Y. Sato, S.-I. Kawaguchi and A. Ogawa, *Chem. Commun.*, 2015, **51**, 10385.
- 45 D. Duncan, E. G. Hope, K. Singh and A. M. Stuart, *Dalton Trans.*, 2011, **40**, 1998.
- 46a E. de Wolf, B. Richter, B.-J. Deelman and G. van Koten, *J. Org. Chem.*, 2000, **65**, 5424.
- 47 H. Gopal, C.E. Snyder Jr. and C. Tamborski, *J. Fluorine Chem.*, 1979, **14**, 511.
- 48a D. J. Adams, J. A. Bennett, D. J. Cole-Hamilton, E. G. Hope, J. Hopewell, J. Kight, P. Pogorzelec and A. M. Stuart, *Dalton Trans.*, 2005, 3862.
- 49 Q. Zhang, Z. Luo and D. P. Curran, *J. Org. Chem.*, 2000, **65**, 8866.
- 50 T. Soós, B. L. Bennett, D. Rutherford, L. P. Barthel-Rosa and J. A. Gladysz, *Organometallics*, 2001, **20**, 3079.
- 51 M. Wende, F. Seidel, J.A. Gladysz, *J. Fluorine Chem.*, 2003, **124**, 45.
- 52a B. Richter, E. de Wolf, G. van Koten and B.-J. Deelman, *J. Org. Chem.*, 2000, **65**, 3885.
- 54a H. Altinel, G. Avsarb, M.K. Yilmaza and B. Guzel, *J. of Supercritical Fluids*, 2009, **51**, 202,
- 54c Y. Hu, D. J. Birdsall, A. M. Stuart, E. G. Hope et. Al., *J. Mol. Catal. A Chem.*, 2004, **219**, 57.
- 51 Y. Nakamura, S. Takeuchi, S. Zhang, K. Okumura and Y. Ohgo, *Tetrahedron Lett.*, 2002, **43**, 3053.
- 56a M. Cavazzini, S. Quici, G. Pozzi, D. Maillard and D. Sinou, *Chem. Commun.*, 2001, 1220.
- 56c J. Bayardon, M. Cavazzini, D. Maillard, G. Pozzi S. Quici and D. Sinou, *Tetrahedron: Asymmetry*, 2003, **14**, 2215.
- 56d D. Maillard, J. Bayardon, J. D. Kurichiparambil, C. Nguéfac-Fournier and D. Sinou, *Tetrahedron: Asymmetry*, 2002, **13**, 1449.
- 58c A. Aghmiz, C. Claver, A. M. Masdeu-Bulto, D. Maillard et. Al., *J. Mol. Catal. A Chem.*, 2004, **208**, 97.
- 63 Z. Xi, H. S. Bazzi and J. A. Gladysz, *J. Am. Chem. Soc.*, 2015, **137**, 10930.
